# Supplementary material for: Accurate prediction of acute pancreatitis severity with integrative blood molecular measurements
Source: publisher site journal article supplement (doi:10.18632/aging.202689), 2021-03-10
Supplement: Supplementary file [file aging-v13i6-202689-supplementary-material-SD1.pdf]

## SUPPLEMENTARY FIGURES

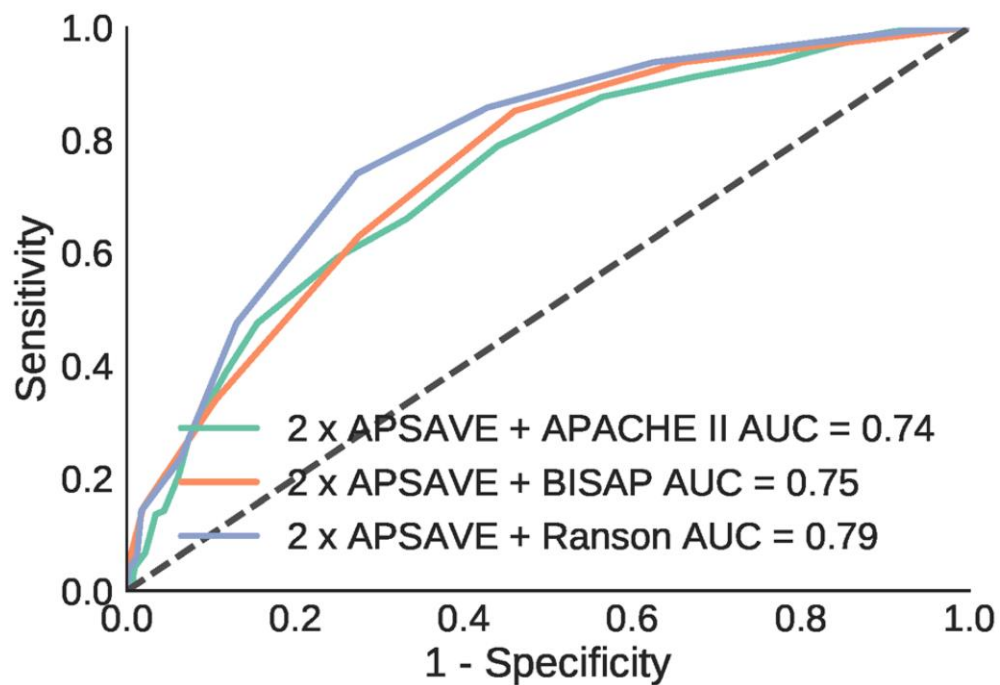

**Supplementary Figure 1.** AUC curves of combinatorial models of APSAVE plus APACHE II, BISAP or Ranson's criteria classifying AP cases of the validation cohort.

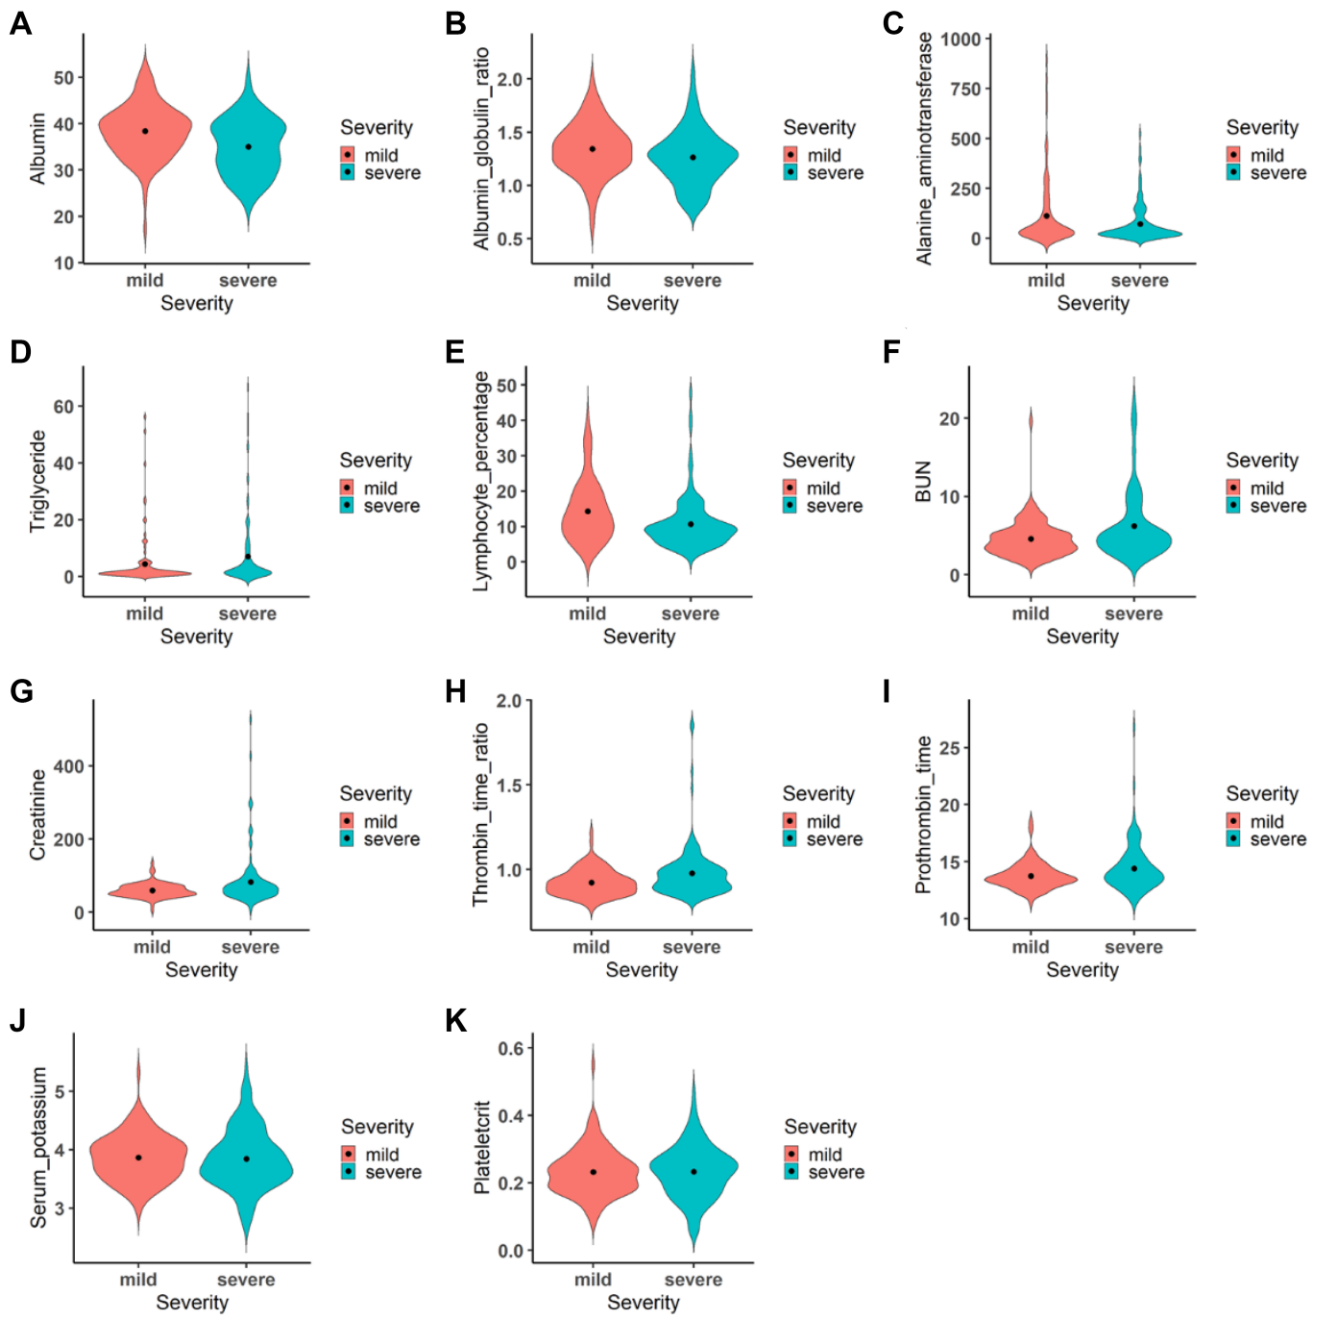

**Supplementary Figure 2.** Distributions of test results of the 11 biomarkers consisting the APSAVE model from the validation cohort are visualized in violin plots.

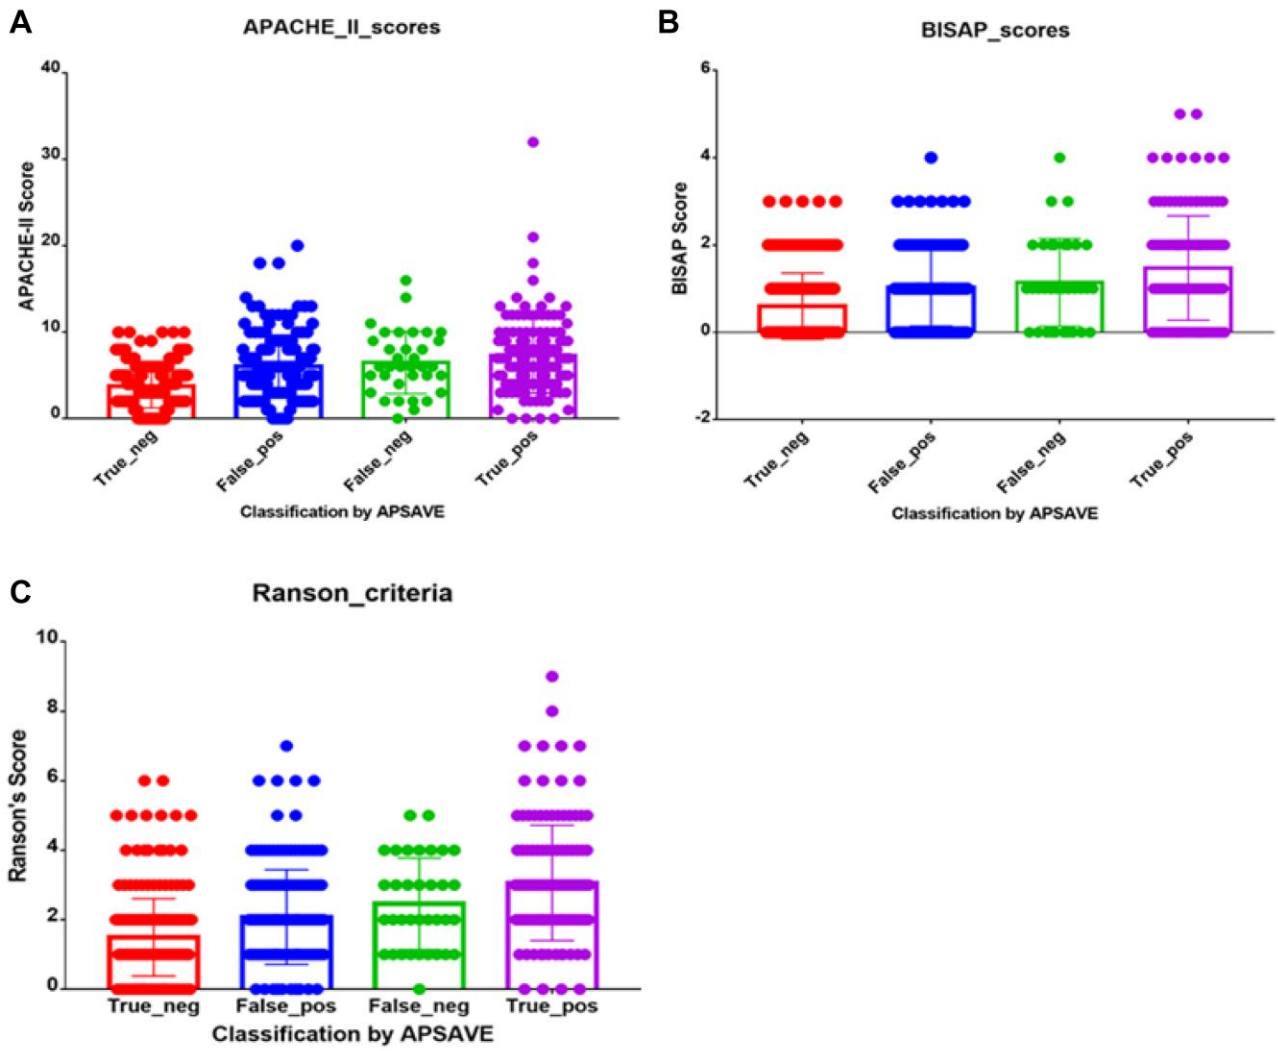

**Supplementary Figure 3.** False\_neg cases (MAP cases mis-classified by APSAVE as SAP) were generally scored higher by either of the 3 stratification systems than the True\_neg cases (Man-Whitney test,  $p < 0.0001$  for APACHE II and Ranson's Criteria, and  $p = 0.0092$  for BISAP).

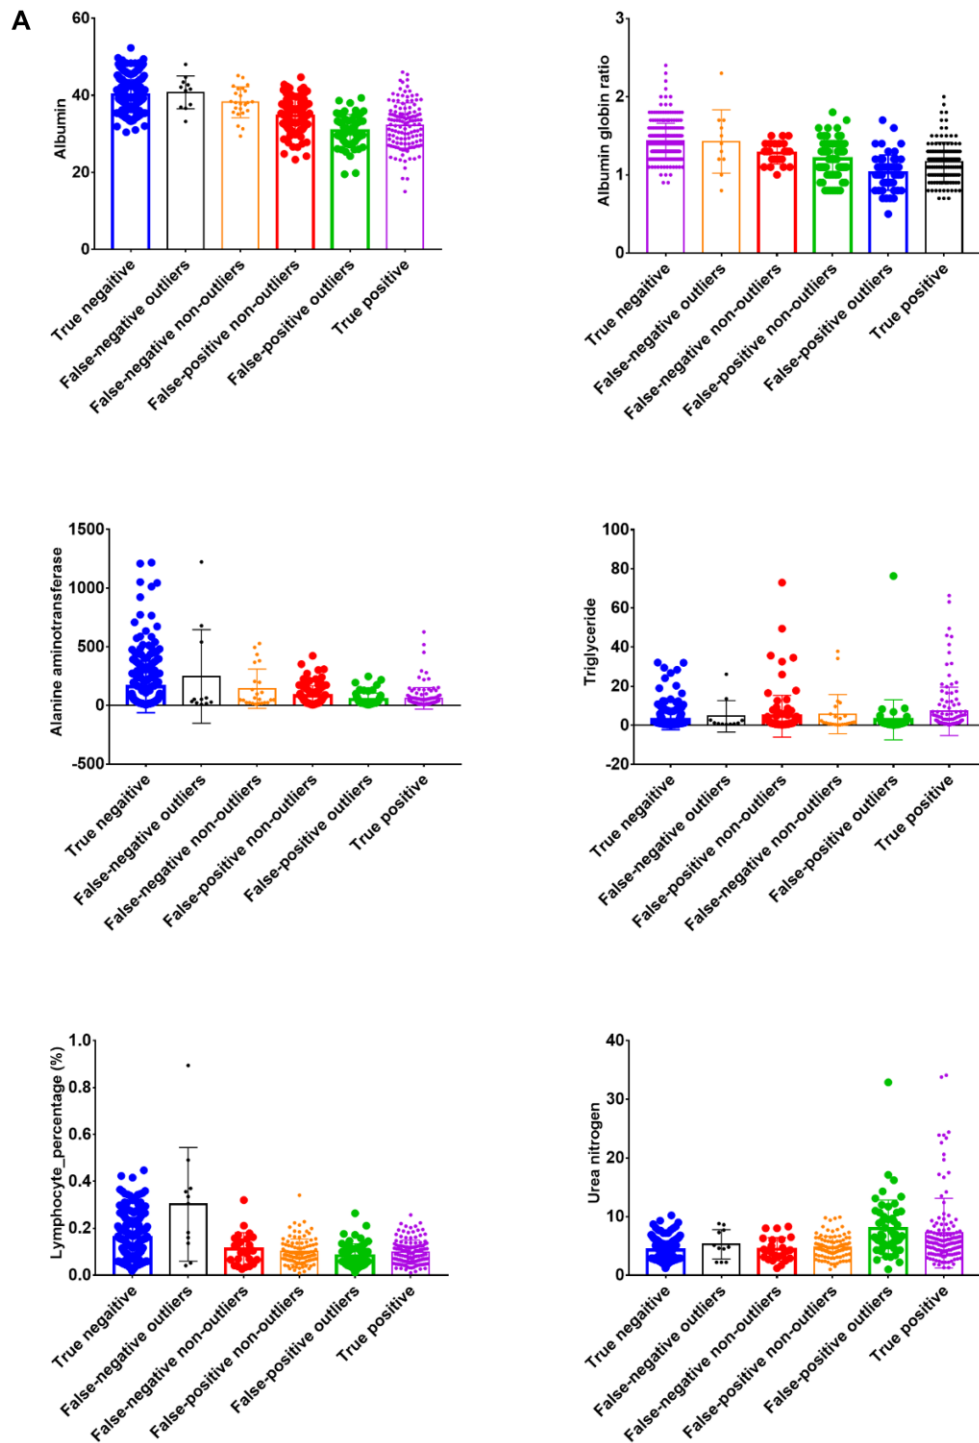

**Supplementary Figure 4A.** The case distributions of true negative, false-negative outliers, false-negative non-outliers, false-positive non-outliers, false-positive outliers and true positive of 11 biomarkers in the APSAVE model.

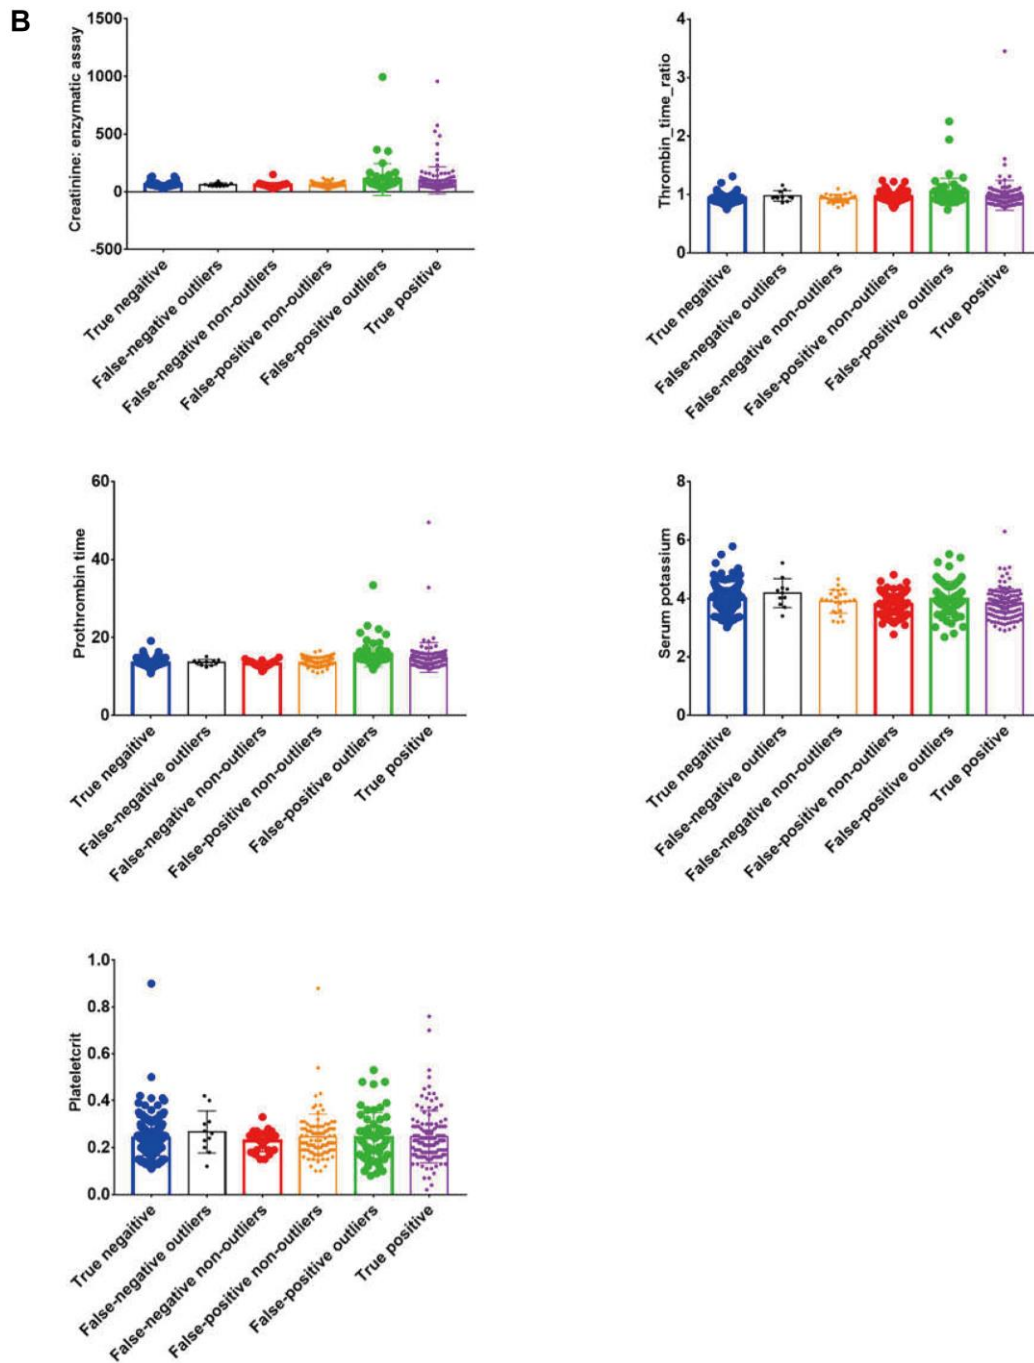

**Supplementary Figure 4B.** The case distributions of true negative, false-negative outliers, false-negative non-outliers, false-positive non-outliers, false-positive outliers and true positive of 11 biomarkers in the APSAVE model.
