# Supplementary material for: Accurate prediction of acute pancreatitis severity with integrative blood molecular measurements
Source: Aging (Albany NY). 2021 Mar 10;13(6):8817–34. doi: 10.18632/aging.202689 (PMC8034948; doi:10.18632/aging.202689)
Supplement: Supplementary Tables [file aging-13-202689-s002.pdf]

## SUPPLEMENTARY TABLES

**Supplementary Table 1. List of 93 biomarkers and vital signs which were measured/collected from AP patients of study cohorts used in this study.**

| Biomarker                                                     | Body fluid     |
|---------------------------------------------------------------|----------------|
| Body temperature                                              | Vital sign     |
| HCO <sub>3</sub> <sup>-</sup> (Bicarbonate)                   | Arterial blood |
| Blood pH                                                      |                |
| Buffer base                                                   |                |
| Arterial carbon dioxide partial pressure (PaCO <sub>2</sub> ) |                |
| Total carbon dioxide                                          |                |
| Fraction of inspiration Oxygen (FIO <sub>2</sub> )            |                |
| Hydrogen ion concentration                                    |                |
| Oxygen concentration                                          |                |
| Arterial oxygen partial pressure (PaO <sub>2</sub> )          |                |
| Arterial oxygen saturation (SaO <sub>2</sub> )                |                |
| pH (temperature)                                              |                |
| PO <sub>2</sub> (temperature)                                 |                |
| Pulmonary arterial oxygen partial pressure                    |                |
| Pulmonary arterial oxygen partial pressure differential       |                |
| Base Excess                                                   |                |
| Standard bicarbonate                                          |                |
| Standard pH                                                   |                |
| Crystal by IQ200                                              | Urine          |
| Mucus by IQ200                                                |                |
| Squamous epithelia by IQ200                                   |                |
| Tube type by IQ200                                            |                |
| Urea creatinine ratio                                         |                |
| Urine amylase                                                 |                |
| Urine Specific Gravity                                        |                |
| Urine pH                                                      |                |
| White blood cell counts                                       |                |
| White blood cell counts by IQ200                              |                |
| Activated partial thromboplastin                              | Venous blood   |
| Alanine aminotransferase                                      |                |
| Albumin                                                       |                |
| Albumin/globulin ratio                                        |                |
| Alanine aminotransferase / Aspartate aminotransferase ratio   |                |
| Apolipoprotein AI                                             |                |
| APTT ratio                                                    |                |
| Aspartate aminotransferase                                    |                |
| Basophil (absolute count)                                     |                |
| Basophil (percentage)                                         |                |

Blood urea nitrogen  
Blood urea nitrogen (Emergency room measurement)  
Indirect bilirubin  
Total bilirubin  
C peptide level after fasting  
C reactive protein  
Total cholesterol  
Creatinine  
Creatinine (emergency room)  
Estimated glomerular filtration rate eGFR  
Eosinophil (absolute count)  
Eosinophil percentage  
Fibrinogen  
Globulin  
Glucose  
Glucose (Emergency room measurement)  
High density lipoprotein cholesterol  
Hematocrit  
Insulin during fasting  
Large platelet ratio  
Low density lipoprotein cholesterol  
Lipoprotein (a)  
Lymphocyte (absolute count)  
Lymphocyte (percentage)  
Mean hemoglobin  
Mean hemoglobin concentration  
Mean platelet volume  
Mean RBC volume  
Monocyte (absolute count)  
Monocytes (percentage)  
Neutrophil (absolute count)  
Neutrophil (percentage)  
Platelet  
Platelet distribution  
Plateletcrit  
Protein total  
Prothrombin activity  
Prothrombin time  
Red blood cell volume distribution  
Red blood cell volume distribution width  
Red blood cell  
Red blood cell by IQ200  
Serum amylase  
Serum amylase (Emergency room measurement)

Serum chloride  
 Serum chloride (Emergency room measurement)  
 Serum potassium  
 Serum potassium (Emergency room measurement)  
 Serum sodium  
 Serum sodium (Emergency room measurement)  
 Thrombin time  
 Thrombin time ratio  
 Triglyceride  
 Uric acid

**Supplementary Table 2. 14 clinical tests were selected by RFE algorithm based on feature importance; 3 of them were further eliminated to obtain the minimal set of features while maintaining accuracy for classification.**

| Clinical Test                 | Selected by RFE | Kept in APSAVE |
|-------------------------------|-----------------|----------------|
| Mean hemoglobin               | Yes             | No             |
| Albumin globulin ratio        | Yes             | Yes            |
| Alanine aminotransferase      | Yes             | Yes            |
| Thrombin time ratio           | Yes             | Yes            |
| Plateletcrit                  | Yes             | Yes            |
| Albumin                       | Yes             | Yes            |
| Prothrombin time              | Yes             | Yes            |
| Creatinine                    | Yes             | Yes            |
| Serum potassium               | Yes             | Yes            |
| Blood urea nitrogen (BUN)     | Yes             | Yes            |
| Prothrombin activity          | Yes             | No             |
| Mean hemoglobin concentration | Yes             | No             |
| Triglyceride                  | Yes             | Yes            |
| Lymph percentage              | Yes             | Yes            |

**Supplementary Table 3. Numbers of true negatives, false positives, true positives and false negatives predicted by APACHE II, BISAP, Ranson's criteria, and APSAVE on validation cohort using RAC grades as the gold standard.**

|        | RAC | APACHE II | BISAP | Ranson | APSAVE |                |
|--------|-----|-----------|-------|--------|--------|----------------|
| Mild   | 406 | 341       | 331   | 332    | 251    | True negative  |
|        |     | 65        | 75    | 74     | 155    | False positive |
| Severe | 162 | 68        | 65    | 91     | 127    | True positive  |
|        |     | 94        | 97    | 71     | 35     | False negative |
